# Supplementary material
Source: publisher site journal article supplement (https://www.spandidos-publications.com/172/downloadSupplementary)
Supplement: Supplementary file 1 [file downloadSupplementary]

Figure S1. Effects of *R. intestinalis* supernatant on Caco2 and BMMs (from TLR5<sup>-/-</sup> mouse) *in vitro*. (A) ELISA analysis of IL-6 in the supernatant of Caco2 cells induced with LPS for 24 h treated with PBS, M or S2. (B) ELISA analysis of IL-6 in the supernatant of BMMs induced with LPS for 12 h (from TLR5<sup>-/-</sup> mouse). \*\*P<0.01 vs. LPS. ##P<0.01 vs LPS + M; ns, not significant; BMM, bone marrow macrophages; IL-6, interleukin-6; LPS, lipopolysaccharide; M, medium; S2, 2X *R. intestinalis* supernatant; TLR5, Toll-like receptor 5.

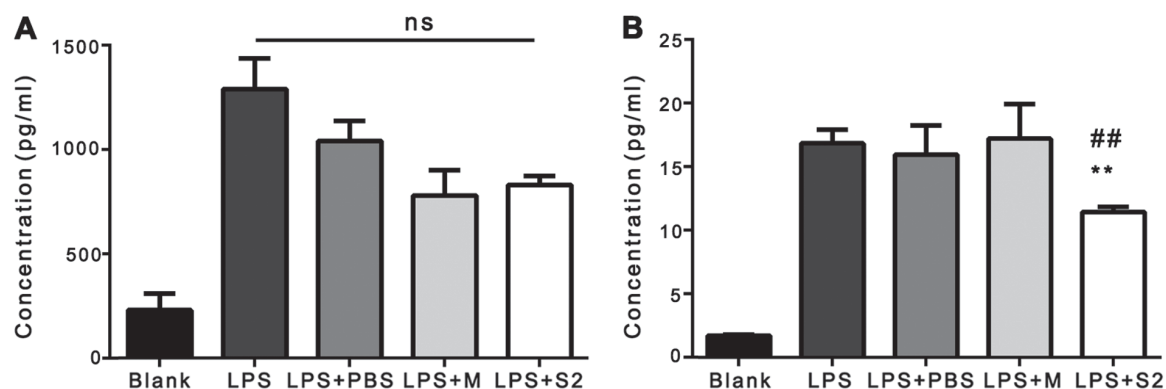

Figure S2. IL-6 expression in RAW246.7 macrophages treated with *R. intestinalis* supernatant and SB *in vitro*. (A) Reverse transcription-quantitative polymerase chain reaction analysis of IL-6 in RAW246.7 cells induced with LPS for 24 h treated with M or S2, SB (0.88 mM). (B) ELISA analysis of IL-6 in the supernatant RAW246.7 cells treated with LPS for 24 h in each group. \*\*P<0.01 vs. LPS. ##P<0.01 vs. LPS + M; ns, not significant; LPS, lipopolysaccharide; M, medium; SB, sodium butyrate; S2, 2X *R. intestinalis* supernatant.

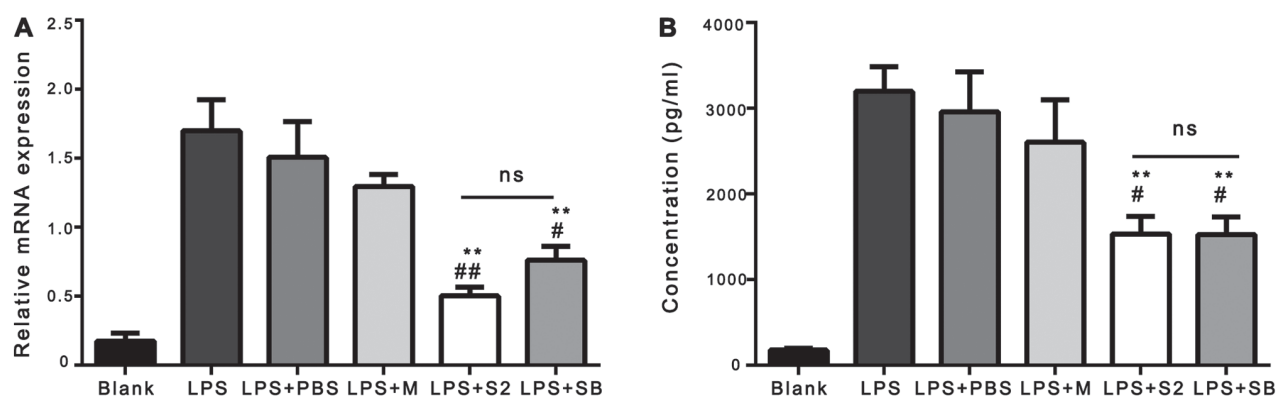

Table SI. Criteria for the disease activity index scores.

| Score | Weight loss (%) | Stool consistency | Occult/bloody stools |
|-------|-----------------|-------------------|----------------------|
| 0     | (-)             | Normal            | Normal               |
| 1     | 1-5             |                   |                      |
| 2     | 6-10            | Loose             | Occult +             |
| 3     | 11-15           |                   |                      |
| 4     | >15             | Diarrhea          |                      |

Bloody stools Disease activity index score=(Combined score of weight loss, stool consistency and occult/bloody stools)/3.

Table SII. Criteria for the assessment of microscopic colonic damage.

| Score                  | Criteria                                                                                                                                                                               |
|------------------------|----------------------------------------------------------------------------------------------------------------------------------------------------------------------------------------|
| 0                      | No inflammation                                                                                                                                                                        |
| 1                      | Low level of lymphocyte infiltration with infiltration seen in <10% hpf, no structural changes observed                                                                                |
| 2                      | Moderate lymphocyte infiltration with infiltration seen in 10-25% hpf, crypt elongation, bowel wall thickening which does not extend beyond mucosal layer, no evidence of ulceration   |
| 3                      | High level of lymphocyte infiltration with infiltration seen in 25-50% hpf, high vascular density, thickening of bowel wall which extends beyond mucosal layer                         |
| 4                      | Marked degree of lymphocyte infiltration with infiltration seen in >50% hpf, high vascular density, crypt elongation with distortion, transmural bowel wall-thickening with ulceration |
| Hpf, high power field. |                                                                                                                                                                                        |

Table SIII. List of primers employed for reverse transcription-quantitative polymerase chain reaction.

| Primers       | Forward                     | Reverse                          |
|---------------|-----------------------------|----------------------------------|
| IL-6          | 5'-TCCATCCAGTTGCCTTCTTG-3'  | 5'-AAGCCTCCGACTTGTGAAGTG-3'      |
| STAT3         | 5'-ACATCTGCCTGGACCGTCTGG-3' | 5'-AACAGCTCCACGATCCTCTCCTC-3'    |
| TNF- $\alpha$ | 5'-GCGACGTGGAAGTGGCAGAAG-3' | 5'-GAATGAGAAGAGGCTGAGACATAGGC-3' |
| GAPDH         | 5'-TCTGACGTGCCGCTGGAGA-3'   | 5'-CAGCCCGGCATCGAAGGTG-3'        |

IL, Interleukin; STAT3, signal transducer and activator of transcription 3; TNF- $\alpha$ , tumor necrosis factor- $\alpha$ .
